# Supplementary material
Source: HighWire-hosted journal article supplement (https://bmjopen.bmj.com/content/14/4/e078561)
Supplement: inline-supplementary-material-1 [file inline-supplementary-material-1.pdf]

**Supplementary Materials – Database search strategies**

| Search strategy for World Health Organisation—International clinical trials registration platform |                                                   |
|---------------------------------------------------------------------------------------------------|---------------------------------------------------|
| Number of search                                                                                  | Search term                                       |
| 1                                                                                                 | Frail*                                            |
| 2                                                                                                 | Lung transplant* AND (candidate OR wait* OR list) |
| 3                                                                                                 | Exercise OR prehab* OR rehab*                     |
| 4                                                                                                 | 1 AND 2 AND 3                                     |

| Search strategy for ClinicalTrials.gov |                                                                                                                                                            |
|----------------------------------------|------------------------------------------------------------------------------------------------------------------------------------------------------------|
| Number of search                       | Search term                                                                                                                                                |
| Condition or disease                   | Frail OR frailty OR frailness                                                                                                                              |
|                                        | Lung transplant OR lung transplantation OR transplantation of lung OR transplant OR grafting procedure OR transplantation OR transplanted OR transplanting |
|                                        | Lung OR pulmo*                                                                                                                                             |
|                                        | Rehabilitation OR rehab OR rehabilitative                                                                                                                  |
| Study Type                             | All studies                                                                                                                                                |
| Study Results                          | All studies                                                                                                                                                |
| Eligibility Criteria                   | Adult (18-64)<br>Sex (all)                                                                                                                                 |

| Search strategy for CINAHL |                                                                                                |
|----------------------------|------------------------------------------------------------------------------------------------|
| Number of search           | Search term                                                                                    |
| 1                          | TI lung transplant* OR AB lung transplant*                                                     |
| 2                          | MH ("lung transplantation+")                                                                   |
| 3                          | 1 OR 2                                                                                         |
| 4                          | TI (wait* or candidate* or pre op* or await*) OR AB (wait* or candidate* or pre op* or await*) |
| 5                          | (MH "waiting lists") OR (MH "pretransplantation period")                                       |
| 6                          | (MH "Preoperative care+")                                                                      |
| 7                          | 4 OR 5 OR 6                                                                                    |
| 8                          | TI (exercise* or rehab* or prehab*) OR AB (exercise* or rehab* or prehab*)                     |
| 9                          | (MH "rehabilitation+")                                                                         |
| 10                         | 8 OR 9                                                                                         |
| 11                         | 3 AND 7 AND 10                                                                                 |

| Search strategy for Cochrane |                                                                                                       |
|------------------------------|-------------------------------------------------------------------------------------------------------|
| Number of search             | Search term                                                                                           |
| 1                            | (lung transplant*):ti,ab,kw (Word variations have been searched )                                     |
| 2                            | MeSH descriptor: [Lung Transplantation] explode all trees                                             |
| 3                            | 1 OR 2                                                                                                |
| 4                            | ((wait* or candidate* or pre op* or pre-op* or await*)):ti,ab,kw (Word variations have been searched) |
| 5                            | MeSH descriptor: [Waiting Lists] explode all tree                                                     |
| 6                            | MeSH descriptor: [Preoperative Exercise] explode all trees                                            |
| 7                            | MeSH descriptor: [Preoperative Care] this term onl                                                    |
| 8                            | 4 OR 5 OR 6 OR 7                                                                                      |
| 9                            | ((exercis* or rehab* or prehab*)):ti,ab,kw (Word variations have been searched )                      |
| 10                           | MeSH descriptor: [Rehabilitation] explode all trees                                                   |
| 11                           | 9 OR 10                                                                                               |
| 12                           | 3 AND 8 AND 11                                                                                        |

| Search strategy for EMBASE (OVID) |                                                                                   |
|-----------------------------------|-----------------------------------------------------------------------------------|
| Number of search                  | Search term                                                                       |
| 1                                 | lung transplant*.ti,ab                                                            |
| 2                                 | exp Lung Transplantation/                                                         |
| 3                                 | 1 or 2                                                                            |
| 4                                 | (wait* or candidate* or pre op* or pre-op* or await*).ti,ab.                      |
| 5                                 | Waiting Lists/                                                                    |
| 6                                 | Preoperative Exercise/ or Preoperative Care/                                      |
| 7                                 | 4 or 5 or 6                                                                       |
| 8                                 | (exercis* or rehab* or prehab*).ti,ab.                                            |
| 9                                 | exp Rehabilitation/                                                               |
| 10                                | 8 or 9                                                                            |
| 11                                | 3 AND 7 AND 10                                                                    |
| 12                                | limit 11 to (yr="1980 -Current" and (adult <18 to 64 years> or aged <65+ years>)) |
